# Supplementary material for: Dynamic/quasi-static stab-resistance and mechanical properties of soft body armour composites constructed from Kevlar fabrics and shear thickening fluids
Source: Royal Society of Chemistry journal article supplement (doi:10.1039/c7ra07549a), 2017-01-01
Supplement: c7ra07549a1.pdf [file c7ra07549a1.pdf]

# **Electronic Supplementary Information**

## **Dynamic/quasi-static stab-resistance and mechanical properties of soft body armour composites constructed by Kevlar fabrics and shear thickening fluids**

Jianbin Qin, Guangcheng Zhang\*, Lisheng Zhou, Jiantong Li, Xuetao Shi\*

Key Laboratory of Space Applied Physics and Chemistry, Ministry of Education, School of Natural and Applied Sciences, Northwestern Polytechnical University, Xi'an 710072, China

**Corresponding author: Guangcheng Zhang      Email: zhangguc@nwpu.edu.cn**

**Corresponding author: Xuetao Shi              Email: shixuetao@nwpu.edu.cn**

**Telephone: +86-29-88431680.              Fax: +86-29-88431680**

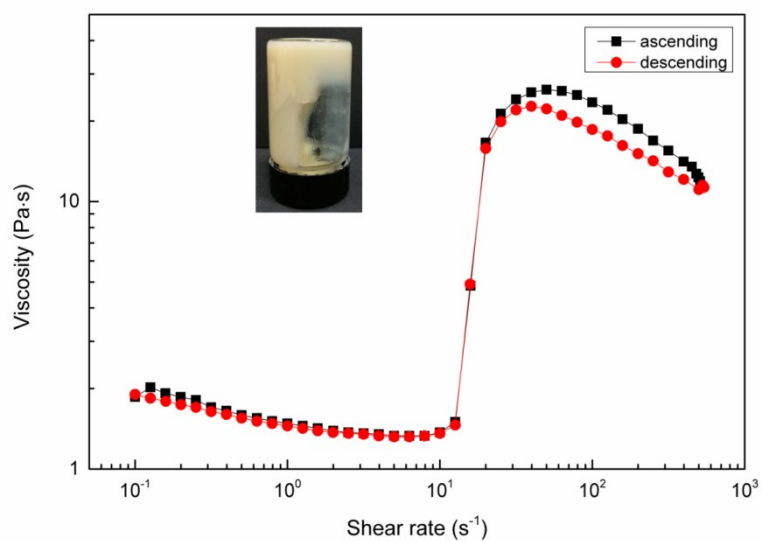

**Figure S1.** Reversible shear thickening behavior of STF with 68 wt % silica microspheres

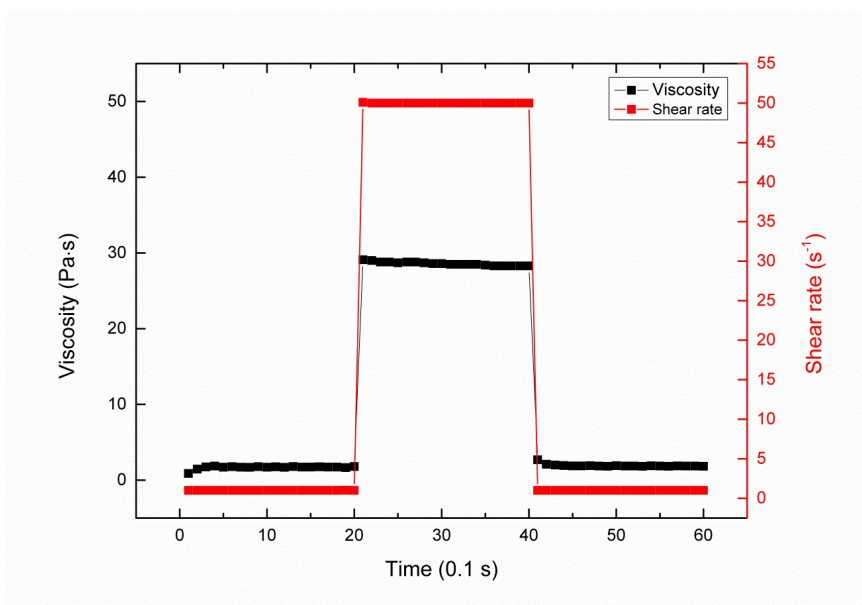

**Figure S2.** Viscosity in response to shear rate for STF with 68 wt % silica

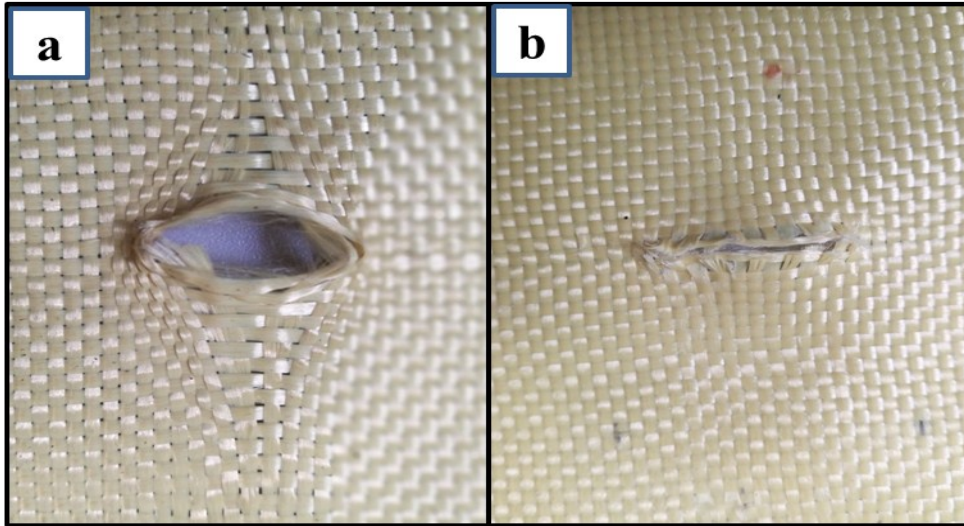

**Figure S3.** Photographs of broken samples for (a) neat Kevlar fabrics and (b) STF-prepared composites in the quasi-static knife-stabbing tests

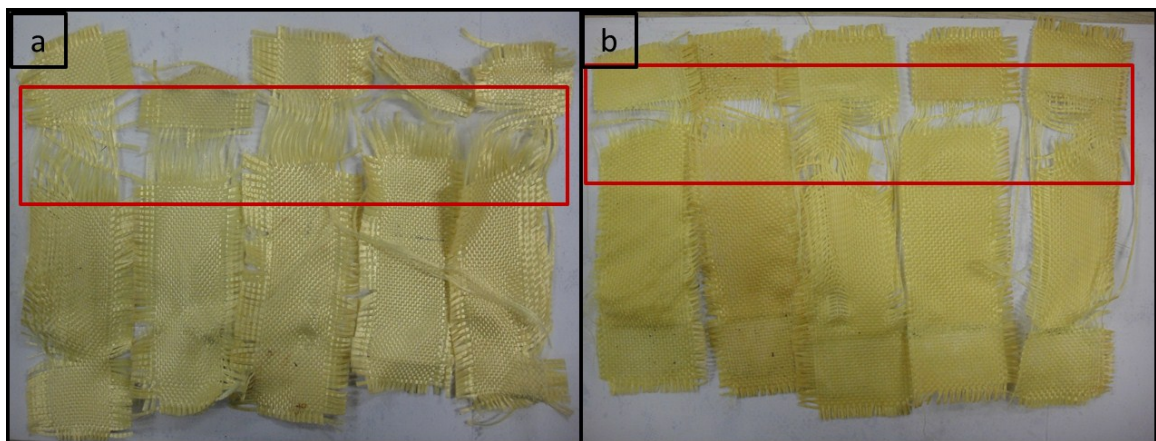

**Figure S4.** Photographs of broken samples for (a) neat Kevlar fabrics and (b) STF-prepared composites in the quasi-static tensile tests
